# Supplementary material
Source: Springer Nature journal article supplement (https://www.springermedizin.de/resource/supplementary/13075_2010_3432_MOESM6_ESM.pdf/9694220)

**A.****CD64<sup>+</sup>CD14<sup>+</sup> Monocytes**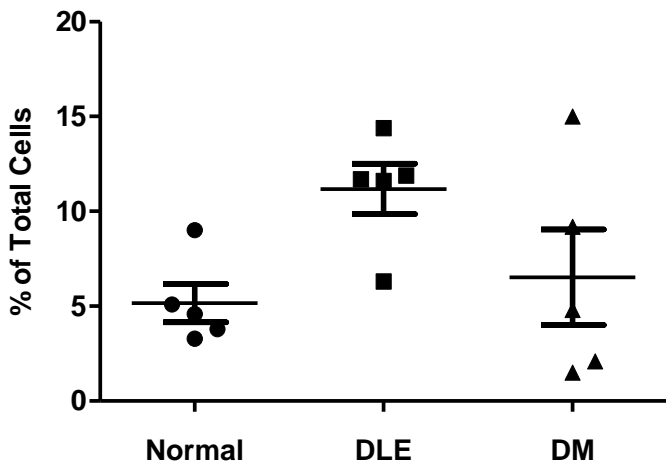**B.****CD11c<sup>+</sup>HLA-DR<sup>hi/low</sup> mDCs**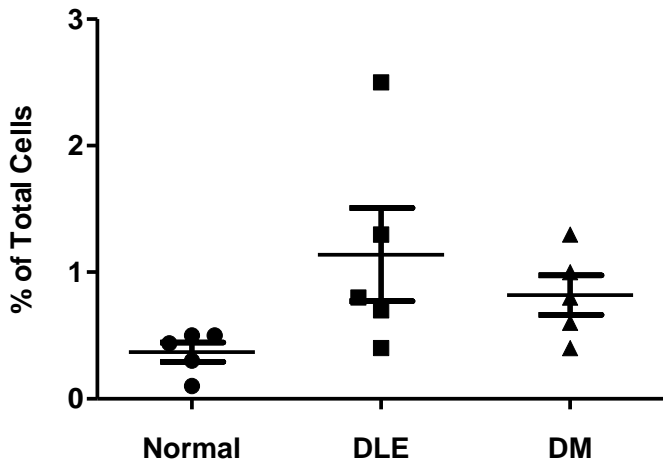

Supplement: MOESM6 [file 9694220]
